# Supplementary material for: Silane-cross-linked polybenzimidazole with improved conductivity for high temperature proton exchange membrane fuel cells
Source: Royal Society of Chemistry journal article supplement (doi:10.1039/c2ta00216g), 2012-10-12
Supplement: c2ta00216g.pdf [file c2ta00216g.pdf]

## Supporting Information

### Silane-cross-linked polybenzimidazole with improved conductivity for high temperature proton exchange membrane fuel cells

Shuang Wang,<sup>a</sup> Chengji Zhao,<sup>a</sup> Wenjia Ma,<sup>a</sup> Na Zhang,<sup>a</sup> Yurong Zhang,<sup>a</sup> Gang Zhang,<sup>a</sup> Zhongguo Liu<sup>a</sup> and Hui Na<sup>\*a</sup>

#### Figures

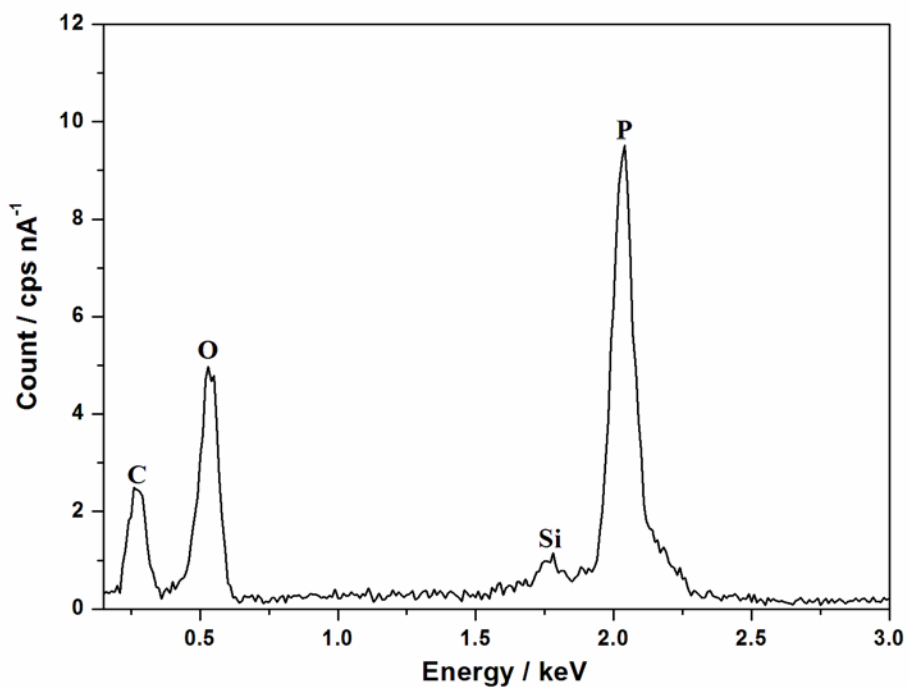

Fig.S1 The EDX spectrum of surface-sectional morphology for PA/SCPBI-1 membrane.

Supplementary Material (ESI) for Journal of Materials Chemistry  
This journal is (c) The Royal Society of Chemistry 2012

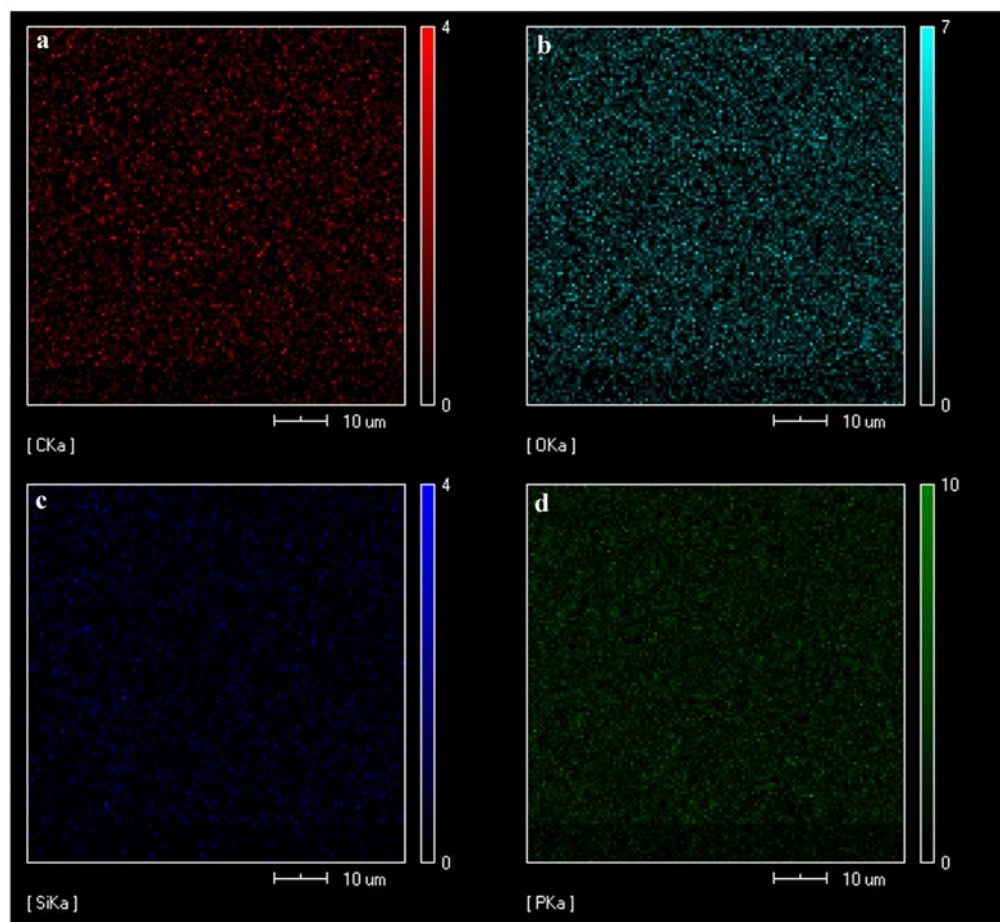

Fig.S2 The SEM-EDX maps showing distribution of C (a), O (b), Si (c) and P (d).
